# Supplementary material for: Data mining for predicting gas diffusivity in zeolitic-imidazolate frameworks (ZIFs)
Source: Royal Society of Chemistry journal article supplement (doi:10.1039/d2ta02624d), 2022-01-01
Supplement: d2ta02624d3.xlsx [file d2ta02624d3.xlsx]

## Sheet: CdIF-1
Non-bonded interactions				Lennard-Jones			Charges
				ε(kj/mol0	σ(nm)		Zn	1.1901
			C1	0.359824	0.34		N	-0.6532
			C2	0.359824	0.34		C1	-0.0583
			C3	0.45773	0.34		C2	0.7379
			H1	0.06276	0.2511		C3	-0.2771
			H2	0.0656888	0.265		H1	0.095
			N	0.71128	0.325		H2	0.059
			Zn	0.0523	0.196
Bonded interactions			Harmonic bond
					k (kj/mol/nm2	r0 (nm)
			C1	C1	343004	0.1375
			C1	N	267608	0.1373
			C1	H1	325598	0.1078
			C3	H2	284177	0.1092
			C2	N	265767	0.1357
			Zn	N	45354	0.2257
			C2	C3	205267	0.1497
			Harmonic angle
						deg	k (kj/mol/rad2
			C1	C1	3N	107.8	900.397
			C1	C1	H1	130.6	551.451
			C2	C3	H2	110.9	564.003
			H2	C3	H2	108	317.984
			C1	N	Zn	125.1	364.845
			C2	N	Co	130.2	356.477
			C1	N	C2	104.6	1026.75
			N	Zn	N	109.5	205.853
			N	C2	N	113.9	936.379
			N	C2	C3	122.9	942.237
			N	C1	H1	121.6	547.267
			Dihedral angle
								kj/mol	m
			N	C1	C1	N	180	89.956	2
			N	C1	C1	H1	180	89.956	2
			C1	C1	N	Zn	180	25.104	2
			C1	C1	N	C2	180	25.104	2
			C3	C2	N	Zn	180	41.84	2
			C3	C2	N	C1	180	41.84	2

## Sheet: ZIF-8
Non-bonded interactions				Lennard-Jones			Charges
				ε(kj/mol0	σ(nm)		Zn	1.3429
			C1	0.359824	0.34		N	-0.6822
			C2	0.359824	0.34		C1	-0.0622
			C3	0.45773	0.34		C2	0.7551
			H1	0.06276	0.2511		C3	-0.2697
			H2	0.0656888	0.265		H1	0.0912
			N	0.71128	0.325		H2	0.0499
			Zn	0.0523	0.196
Bonded interactions			Harmonic bond
					k (kj/mol/nm2	r0 (nm)
			C1	C1	339992	0.1375
			C1	N	253048	0.1376
			C1	H1	327691	0.1077
			C3	H2	286855	0.1091
			C2	N	257818	0.136
			Zn	N	52802.1	0.2048
			C2	C3	203761	0.1498
			Harmonic angle
						deg	k (kj/mol/rad2
			C1	C1	3N	107.9	909.602
			C1	C1	H1	130.6	552.288
			C2	C3	H2	110.8	565.677
			H2	C3	H2	108.1	317.984
			C1	N	Zn	125.1	475.302
			C2	N	Co	130.3	462.75
			C1	N	C2	104.5	1077.8
			N	Zn	N	109.5	296.227
			N	C2	N	113.8	955.626
			N	C2	C3	123.1	958.973
			N	C1	H1	121.5	549.778
			Dihedral angle
								kj/mol	m
			N	C1	C1	N	180	89.956	2
			N	C1	C1	H1	180	89.956	2
			C1	C1	N	Zn	180	25.104	2
			C1	C1	N	C2	180	25.104	2
			C3	C2	N	Zn	180	41.84	2
			C3	C2	N	C1	180	41.84	2

## Sheet: ZIF-67
Non-bonded interactions				Lennard-Jones			Charges
				ε(kj/mol0	σ(nm)		Zn	1.3497
			C1	0.359824	0.34		N	-0.6956
			C2	0.359824	0.34		C1	-0.0581
			C3	0.45773	0.34		C2	0.7846
			H1	0.06276	0.2511		C3	-0.3094
			H2	0.0656888	0.265		H1	0.091
			N	0.71128	0.325		H2	0.0584
			Zn	0.0523	0.196
Bonded interactions			Harmonic bond
					k (kj/mol/nm2	r0 (nm)
			C1	C1	340243	0.1375
			C1	N	249952	0.1377
			C1	H1	327775	0.1077
			C3	H2	286102	0.1091
			C2	N	253383	0.1361
			Zn	N	58910.7	0.2044
			C2	C3	286102	0.1498
			Harmonic angle
						deg	k (kj/mol/rad2
			C1	C1	3N	107.9	920.48
			C1	C1	H1	130.6	551.451
			C2	C3	H2	110.8	564.84
			H2	C3	H2	108.1	317.984
			C1	N	Zn	124.7	537.226
			C2	N	Co	130.8	534.715
			C1	N	C2	104.4	1074.45
			N	Zn	N	109.5	924.66
			N	C2	N	113.9	964.83
			N	C2	C3	123.1	974.872
			N	C1	H1	121.5	550.614
			Dihedral angle
								kj/mol	m
			N	C1	C1	N	180	89.956	2
			N	C1	C1	H1	180	89.956	2
			C1	C1	N	Zn	180	25.104	2
			C1	C1	N	C2	180	25.104	2
			C3	C2	N	Zn	180	41.84	2
			C3	C2	N	C1	180	41.84	2

## Sheet: BeIF-1
Non-bonded interactions				Lennard-Jones			Charges
				ε(kj/mol0	σ(nm)		Zn	1.6627
			C1	0.359824	0.34		N	-0.6646
			C2	0.359824	0.34		C1	-0.0896
			C3	0.45773	0.34		C2	0.6287
			H1	0.06276	0.2511		C3	-0.1824
			H2	0.0656888	0.265		H1	0.0875
			N	0.71128	0.325		H2	0.0186
			Zn	0.0523	0.196
Bonded interactions			Harmonic bond
					k (kj/mol/nm2	r0 (nm)
			C1	C1	342753	0.1375
			C1	N	262253	0.1376
			C1	H1	330201	0.1077
			C3	H2	286939	0.1091
			C2	N	254220	0.1364
			Zn	N	56400.3	0.1749
			C2	C3	203091	0.1498
			Harmonic angle
						deg	k (kj/mol/rad2
			C1	C1	3N	108.1	941.4
			C1	C1	H1	128.6	533.042
			C2	C3	H2	110.8	557.309
			H2	C3	H2	108.1	317.984
			C1	N	Zn	125.6	686.176
			C2	N	Co	130.1	671.95
			C1	N	C2	104.3	1128.84
			N	Zn	N	109.5	550.614
			N	C2	N	113.8	1028.43
			N	C2	C3	123.9	1006.67
			N	C1	H1	121.4	558.982
			Dihedral angle
								kj/mol	m
			N	C1	C1	N	180	89.956	2
			N	C1	C1	H1	180	89.956	2
			C1	C1	N	Zn	180	25.104	2
			C1	C1	N	C2	180	25.104	2
			C3	C2	N	Zn	180	41.84	2
			C3	C2	N	C1	180	41.84	2

## Sheet: Cu-ZIF-8
Non-bonded interactions				Lennard-Jones			Charges
				ε(kj/mol0	σ(nm)		Zn	1.2249
			C1	0.359824	0.34		N	-0.7313
			C2	0.359824	0.34		C1	-0.056
			C3	0.45773	0.34		C2	0.9664
			H1	0.06276	0.2511		C3	-0.5732
			H2	0.0656888	0.265		H1	0.097
			N	0.71128	0.325		H2	0.125
			Zn	0.0523	0.196
Bonded interactions			Harmonic bond
					k (kj/mol/nm2	r0 (nm)
			C1	C1	342753	0.1375
			C1	N	262253	0.1376
			C1	H1	330201	0.1077
			C3	H2	286939	0.1091
			C2	N	254220	0.1364
			Zn	N	56400.3	0.1749
			C2	C3	203091	0.1498
			Harmonic angle
						deg	k (kj/mol/rad2
			C1	C1	3N	107.7	902.07
			C1	C1	H1	128.6	535.552
			C2	C3	H2	110.7	546.43
			H2	C3	H2	108.2	324.678
			C1	N	Zn	124.4	743.915
			C2	N	Co	130.8	724.669
			C1	N	C2	104.7	1052.69
			N	Zn	N	110.9	398.317
			N	C2	N	113.6	827.595
			N	C2	C3	123.3	969.014
			N	C1	H1	121.6	474.466
			Dihedral angle
								kj/mol	m
			N	C1	C1	N	180	89.956	2
			N	C1	C1	H1	180	89.956	2
			C1	C1	N	Zn	180	25.104	2
			C1	C1	N	C2	180	25.104	2
			C3	C2	N	Zn	180	41.84	2
			C3	C2	N	C1	180	41.84	2

## Sheet: Mn-ZIF-8
Non-bonded interactions				Lennard-Jones			Charges
				ε(kj/mol0	σ(nm)		Zn	1.3032
			C1	0.359824	0.34		N	-0.7015
			C2	0.359824	0.34		C1	-0.0591
			C3	0.45773	0.34		C2	0.8832
			H1	0.06276	0.2511		C3	-0.6331
			H2	0.0656888	0.265		H1	0.0937
			N	0.71128	0.325		H2	0.144
			Zn	0.0523	0.196
Bonded interactions			Harmonic bond
					r0 (nm)	k (kj/mol/nm2
			C1	C1	0.2143	48032.3
			C1	N	0.1362	253885
			C1	H1	0.1378	257232
			C3	H2	0.1375	339992
			C2	N	0.1078	326185
			Zn	N	0.1498	203426
			C2	C3	0.1092	284679
			Harmonic angle
						deg	k (kj/mol/rad2
			N	Zn	N	109.5	113.805
			Zn	N	C2	130.8	186.606
			Zn	N	C1	125	191.627
			C1	N	C2	104.2	539.736
			C1	C1	N	108	458.985
			C1	C1	H1	128.7	267.358
			C2	C3	H2	110.9	284.93
			H2	C3	H2	108	156.063
			N	C2	N	114	484.926
			N	C2	C3	122.9	487.436
			N	C1	H1	121.5	276.144
			Dihedral angle
								kj/mol	m
			N	C1	C1	N	180	89.956	2
			N	C1	C1	H1	180	89.956	2
			C1	C1	N	Zn	180	25.104	2
			C1	C1	N	C2	180	25.104	2
			C3	C2	N	Zn	180	41.84	2
			C3	C2	N	C1	180	41.84	2

## Sheet: Mg-ZIF-8
Non-bonded interactions				Lennard-Jones			Charges
				ε(kj/mol0	σ(nm)		Zn	1.3746
			C1	0.359824	0.34		N	-0.6968
			C2	0.359824	0.34		C1	-0.0661
			C3	0.45773	0.34		C2	0.8567
			H1	0.06276	0.2511		C3	-0.6155
			H2	0.0656888	0.265		H1	0.0923
			N	0.71128	0.325		H2	0.1376
			Zn	0.0523	0.196
Bonded interactions			Harmonic bond
					r0 (nm)	k (kj/mol/nm2
			C1	C1	0.2099	50877.4
			C1	N	0.1361	258153
			C1	H1	0.1378	259241
			C3	H2	0.1375	339322
			C2	N	0.1078	325934
			Zn	N	0.1499	202673
			C2	C3	0.1092	284512
			Harmonic angle
						deg	k (kj/mol/rad2
			N	Zn	N	109.9	141.419
			Zn	N	C2	125.8	218.823
			Zn	N	C1	129.1	227.191
			C1	N	C2	104.2	550.196
			C1	C1	N	108.1	449.78
			C1	C1	H1	128.6	267.358
			C2	C3	H2	110.9	285.767
			H2	C3	H2	108	156.063
			N	C2	N	113.8	480.323
			N	C2	C3	123.7	481.16
			N	C1	H1	121.5	273.215
			Dihedral angle
								kj/mol	m
			N	C1	C1	N	180	89.956	2
			N	C1	C1	H1	180	89.956	2
			C1	C1	N	Zn	180	25.104	2
			C1	C1	N	C2	180	25.104	2
			C3	C2	N	Zn	180	41.84	2
			C3	C2	N	C1	180	41.84	2

## Sheet: ZIF-8-Br
Non-bonded interactions				Lennard-Jones			Charges
				ε(kj/mol0	σ(nm)		Zn	1.3746
			C1	0.359824	0.34		N	-0.6968
			C2	0.359824	0.34		C1	-0.0661
			Br	1.8731	0.4		C2	0.8567
			H1	0.06276	0.2511		Br	-0.6155
			N	0.71128	0.325		H1	0.0923
			Zn	0.0523	0.196
Bonded interactions			Harmonic bond
					r0 (nm)	k (kj/mol/nm2
			C1	C1	0.1374	345849
			C1	N	0.1379	251207
			C1	H1	0.1076	333632
			C2	N	0.1348	280579
			Zn	N	0.205	52300
			C2	Br	0.1914	102508
			Harmonic angle
						deg	k (kj/mol/rad2
			C1	C1	N	108.1	897.05
			C1	C1	H1	130.8	551.451
			C1	N	Zn	124.7	392.459
			C2	N	Zn	134.5	387.438
			C1	N	C2	102.7	1046.84
			N	Zn	N	109.5	301.248
			N	C2	N	116.8	753.957
			N	C2	Br	121.7	564.84
			N	C1	H1	121.1	546.43
			Dihedral angle
			Dihedral angle
								kj/mol	m
			N	C1	C1	N	180	89.956	2
			N	C1	C1	H1	180	89.956	2
			C1	C1	N	Zn	180	25.104	2
			C1	C1	N	C2	180	25.104	2
			Br	C2	N	Zn	180	41.84	2
			Br	C2	N	C1	180	41.84	2

## Sheet: Co-ZIF-8-Br
Non-bonded interactions				Lennard-Jones			Charges
				ε(kj/mol0	σ(nm)		Zn	1.3962
			C1	0.359824	0.34		N	-0.618
			C2	0.359824	0.34		C1	0.0121
			Br	1.8731	0.4		C2	0.6067
			H1	0.06276	0.2511		Br	-0.2418
			N	0.71128	0.325		H1	0.0744
			Zn	0.0523	0.196
Bonded interactions			Harmonic bond
					r0 (nm)	k (kj/mol/nm2
			Zn	N	0.2046	58325
			C2	N	0.1349	275558
			C1	N	0.1381	247693
			C1	C1	0.1374	346100
			C1	H1	0.1076	333632
			C2	Br	0.1914	102424
			Harmonic angle
						deg	k (kj/mol/rad2
			N	Zn	N	109.5	379.07
			Zn	N	C2	134.7	529.694
			Zn	N	C1	122.7	523
			C1	N	C2	102.6	1042.65
			C1	C1	N	108.2	902.907
			C1	C1	H1	130.7	549.778
			N	C2	N	116.8	743.915
			N	C2	Br	121.6	569.861
			N	C1	H1	121.1	546.43
			Dihedral angle
			Dihedral angle
								kj/mol	m
			N	C1	C1	N	180	89.956	2
			N	C1	C1	H1	180	89.956	2
			C1	C1	N	Zn	180	25.104	2
			C1	C1	N	C2	180	25.104	2
			Br	C2	N	Zn	180	41.84	2
			Br	C2	N	C1	180	41.84	2

## Sheet: ZIF-8-Cl
Non-bonded interactions				Lennard-Jones			Charges
				ε(kj/mol0	σ(nm)		Zn	1.4803
			C1	0.359824	0.34		N	-0.6012
			C2	0.359824	0.34		C1	-0.0286
			Br	1.2552	0.34		C2	0.5945
			H1	0.06276	0.2511		Br	-0.2492
			N	0.71128	0.325		H1	0.0871
			Zn	0.0523	0.196
Bonded interactions			Harmonic bond
					r0 (nm)	k (kj/mol/nm2
			C1	C1	0.1374	345013
			C1	N	0.1379	253801
			C1	H1	0.1076	333046
			C2	N	0.1347	271876
			Zn	N	0.2049	51630.6
			C2	Cl	0.1752	129537
			Harmonic angle
						deg	k (kj/mol/rad2
			C1	C1	N	108.1	893.702
			C1	C1	H1	130.8	548.941
			C1	N	Zn	122.8	398.317
			C2	N	Zn	133.6	395.806
			C1	N	C2	102.8	1069.43
			N	Zn	N	109.5	297.064
			N	C2	N	116.7	769.019
			N	C2	Br	121.3	639.315
			N	C1	H1	121.1	549.778
			Dihedral angle
			Dihedral angle
								kj/mol	m
			N	C1	C1	N	180	89.956	2
			N	C1	C1	H1	180	89.956	2
			C1	C1	N	Zn	180	25.104	2
			C1	C1	N	C2	180	25.104	2
			Br	C2	N	Zn	180	41.84	2
			Br	C2	N	C1	180	41.84	2

[truncated: 59 more sheets: Im-ZIF-8, ZIF-7-8, Co-ZIF-7-8, Be-ZIF-7-8, Cu-ZIF-7-8, Mg-ZIF-7-8, Mn-ZIF-7-8, ZIF-7-8-Cl, ZIF-7-8-Br, ZIF-7-8-I, ZIF-7-8-F, Cd-ZIF-7-8-Cl, Cd-ZIF-7-8-Br, Co-ZIF-7-8-Br, Co-ZIF-7-8-Cl, Co-ZIF-7-8-F, Co-ZIF-7-8-I, Be-ZIF-7-8-F, Be-ZIF-7-8-I, Cu-ZIF-7-8-F …]
